# Supplementary material for: A self-ratiometric and selective electrochemical sensor for the detection of tyrosinase in mouse brain homogenate
Source: Royal Society of Chemistry journal article supplement (doi:10.1039/d2an00196a), 2022-01-01
Supplement: d2an00196a1.pdf [file d2an00196a1.pdf]

## ***Supporting Information***

### **A self-ratiometric and selective electrochemical sensor for detection of tyrosinase in mouse brain homogenate**

Yumei Xu\*, Bing Hu, Yanjun Cui, Li Li, Fang Nian and Zhixia Zhang

*Institute of Agricultural Resources Chemistry and Application, College of Science,  
Gansu Agriculture University*

*No. 1 Yingmen village, Anning District, Lanzhou, Gansu 730070, China.*

*E-mail: xuym@gsau.edu.cn*

#### **Contents**

1. NMR spectra and HR-MS data of Pyyp (Figures S1-S5)
2. HPLC-MS spectra of the reaction system (Figures S6-S9)
3. Reproducibility (Figure S10)
4. Repeatability (Figure S11)
5. Anti-biofouling capability (Figure S12)
6. Selectivity tests (Figure S13)
7. Post calibration (Figure S14)

## 1. NMR spectra and HR-MS data

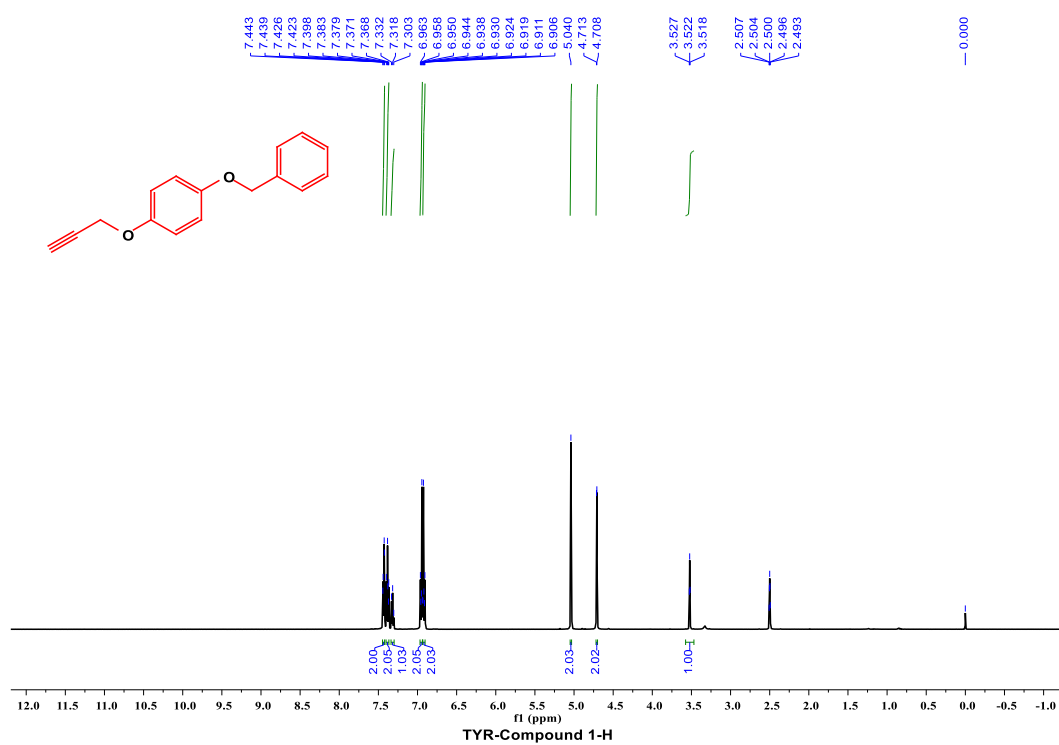

Figure S1. <sup>1</sup>H NMR spectrum of Compound 1.

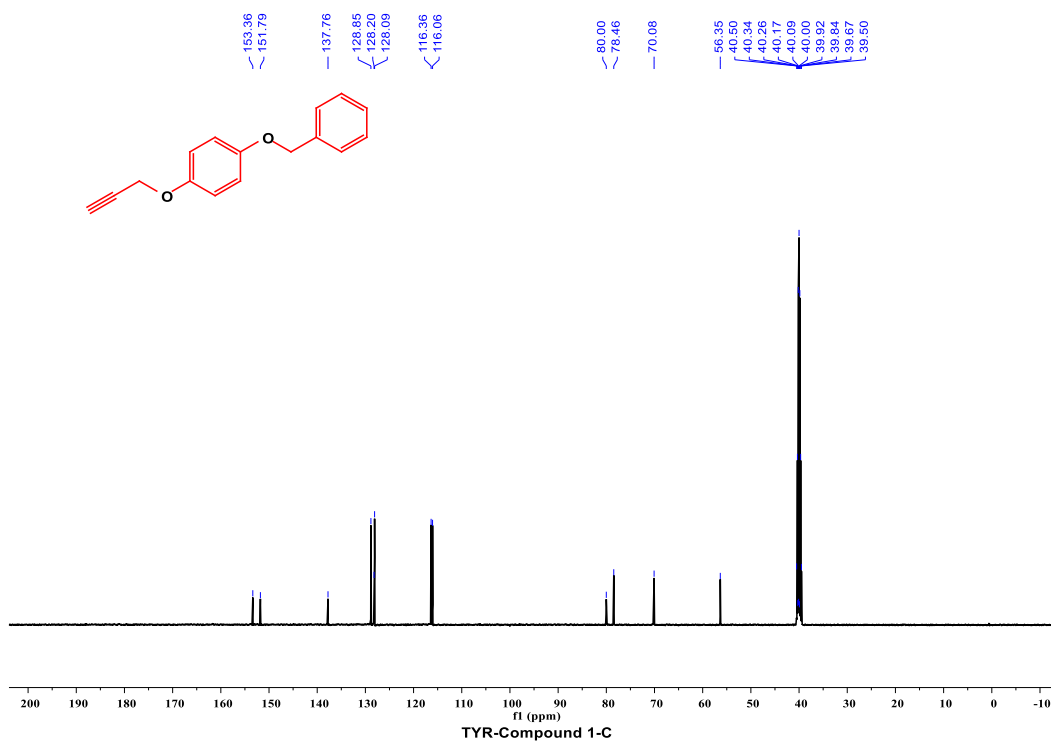

Figure S2. <sup>13</sup>C NMR spectrum of Compound 1.

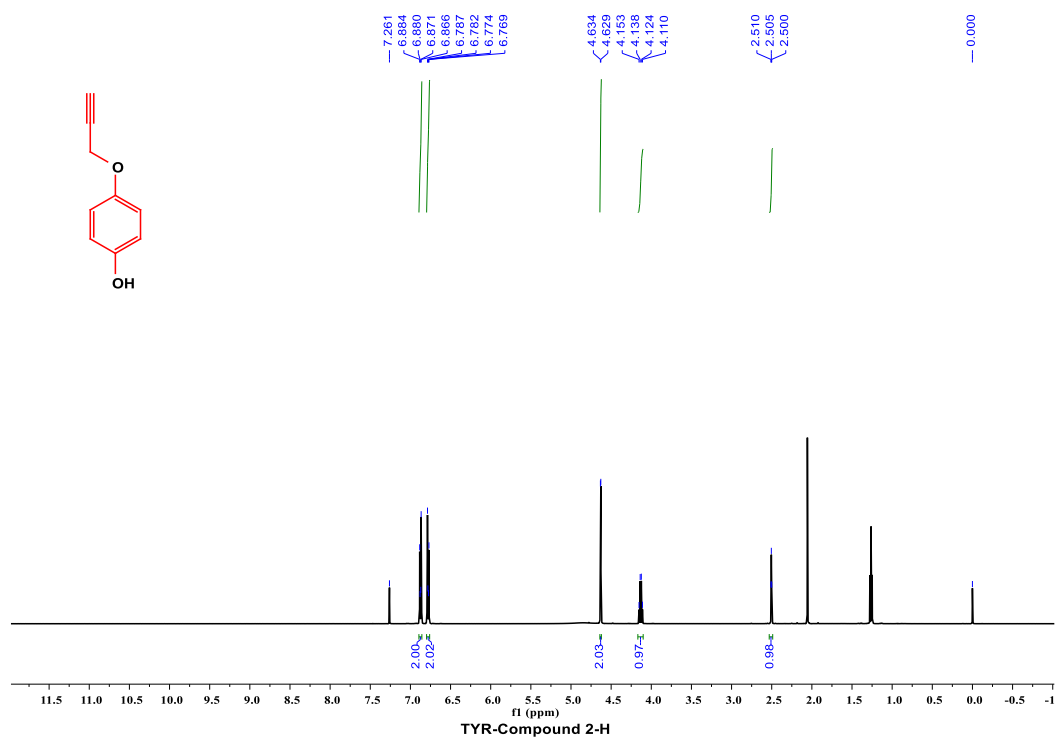

Figure S3. <sup>1</sup>H NMR spectrum of Pyyp.

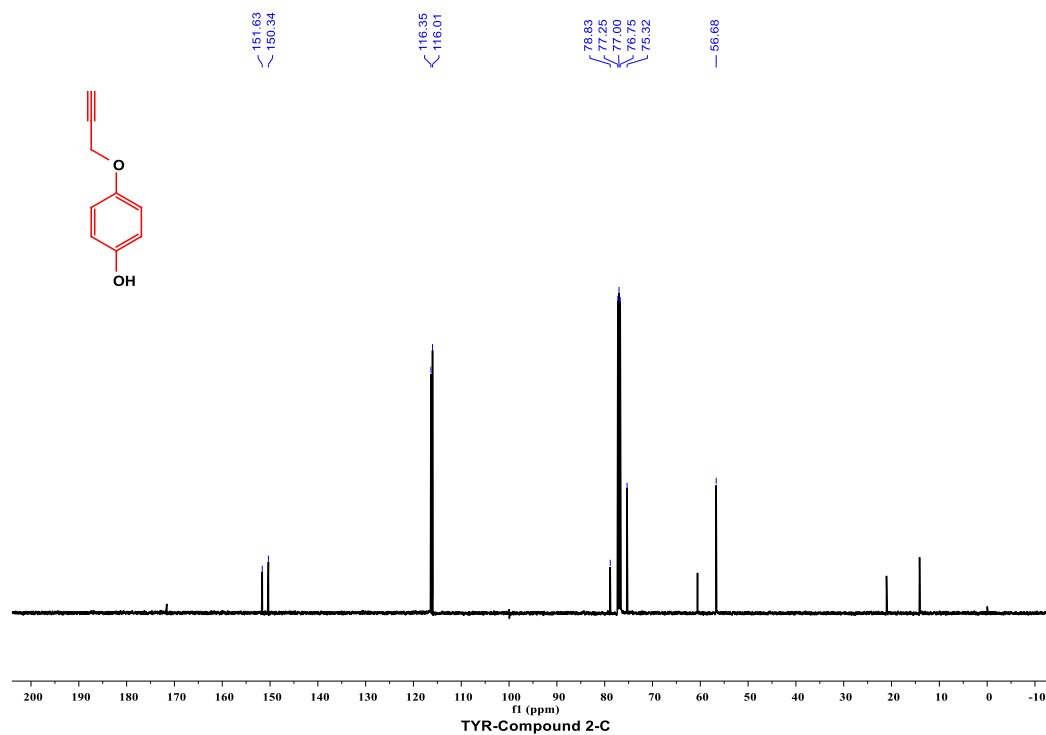

Figure S4. <sup>13</sup>C NMR spectrum of Pyyp.

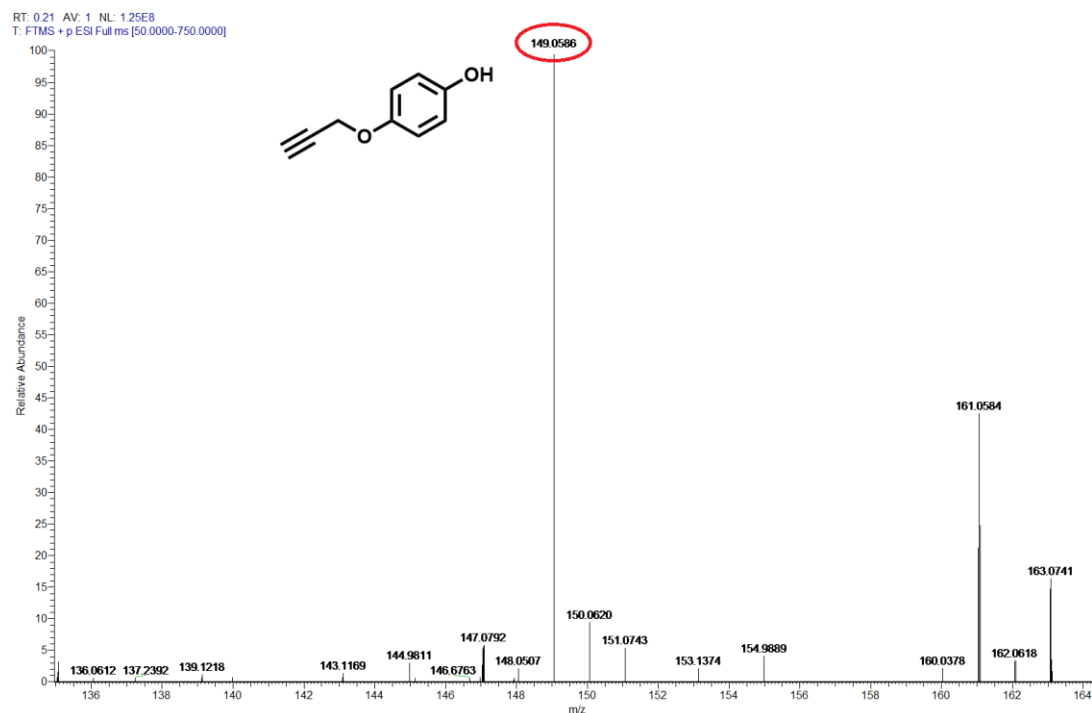

Figure S5. HR-MS spectrum of Pyyp.

## 2. HPLC-MS spectra of the reaction system

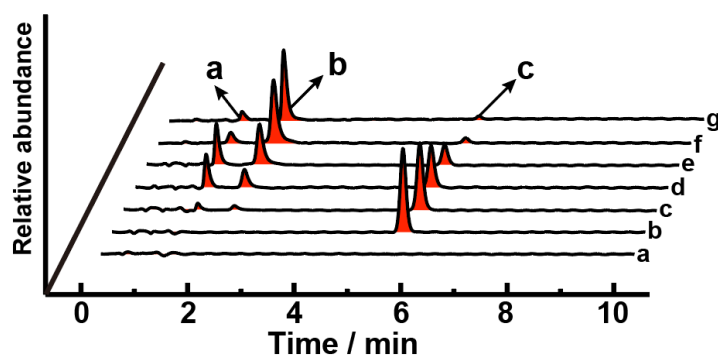

Figure S6. HPLC kinetic profiles of Pyyp molecules (5 mM) reacting with 10 U mL<sup>-1</sup> Tyr. a) Blank; b) Pyyp molecules; c-g) the reaction between Pyyp molecules and Tyr for 20, 40, 60, 80, 100 min, respectively.

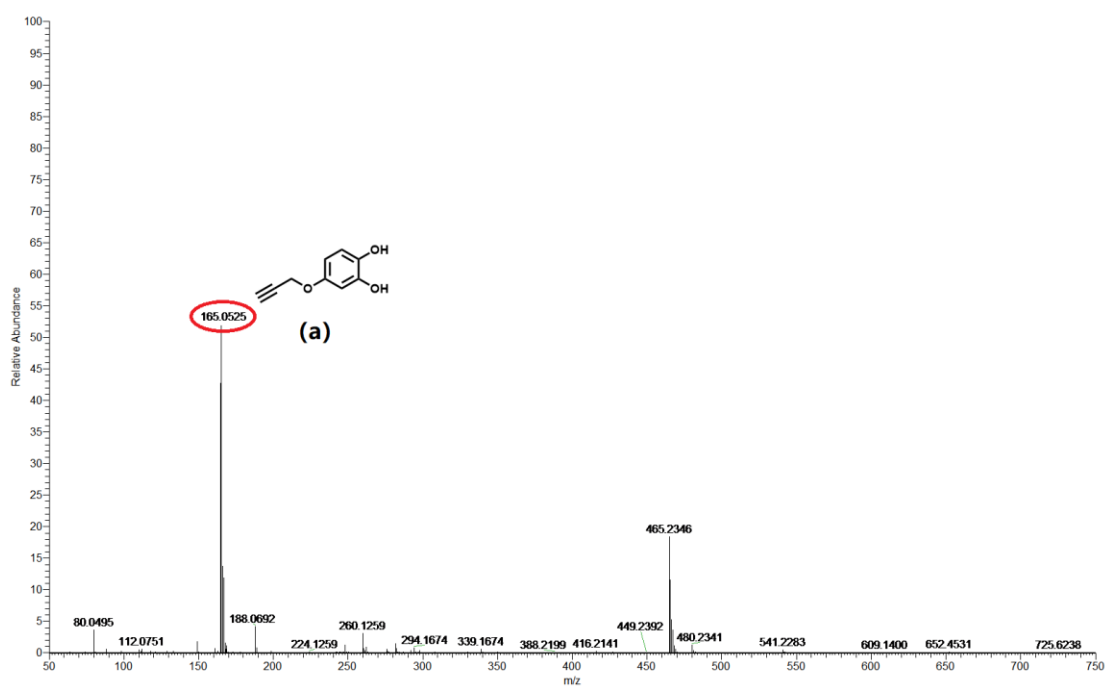

**Figure S7.** Mass spectrum of peak (a) shown in Figure S6.

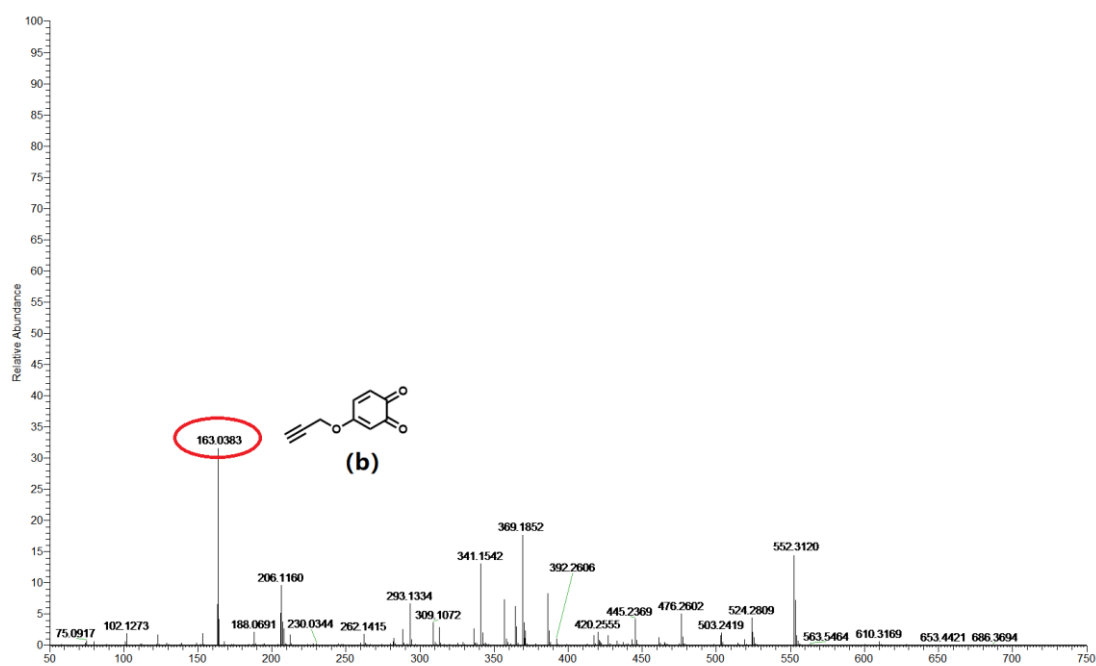

**Figure S8.** Mass spectrum of peak (b) shown in Figure S6.

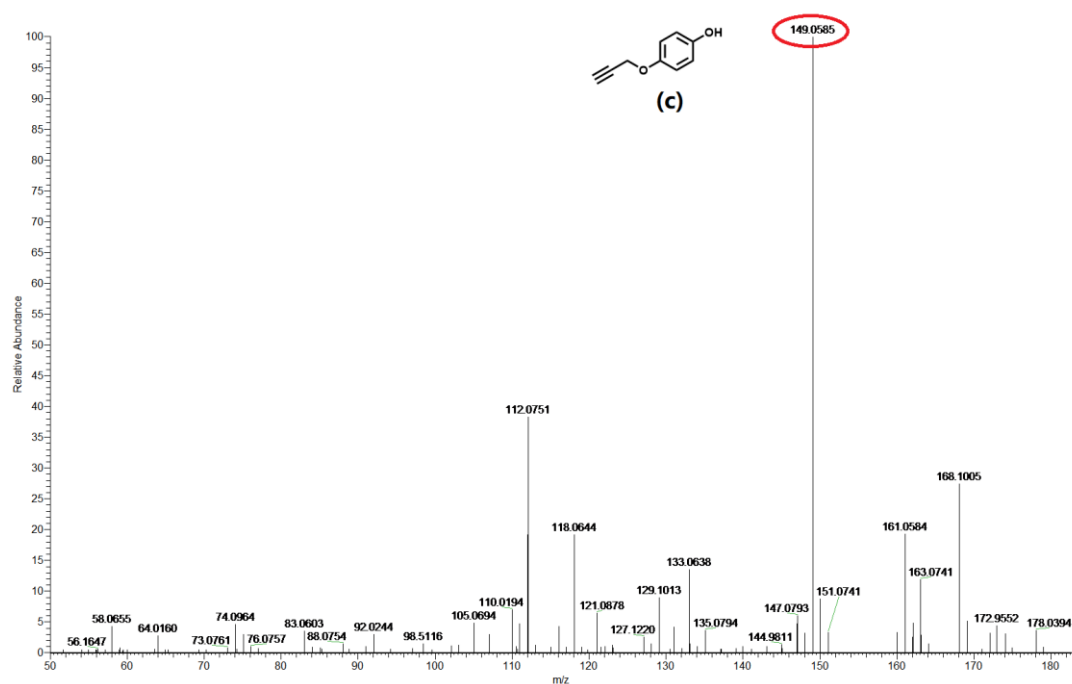

**Figure S9.** Mass spectrum of peak (c) shown in Figure S6.

### 3. Reproducibility

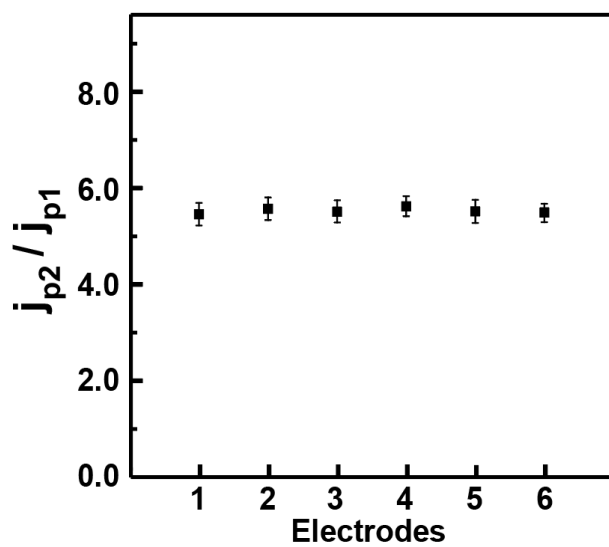

**Figure S10.** The  $j_{p2}/j_{p1}$  values of six electrodes in 0.1 M PBS solution (pH 7.4) containing 10 U mL<sup>-1</sup> Tyr.

#### 4. Repeatability

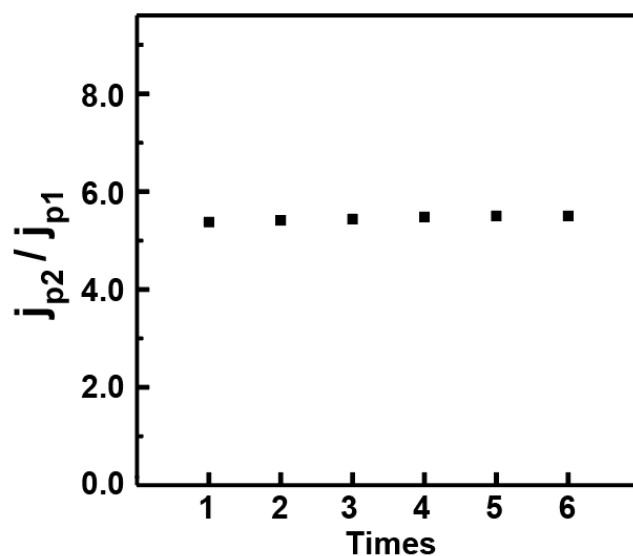

**Figure S11.** The  $j_{p2}/j_{p1}$  values of one electrode for six times in 0.1 M PBS solution (pH 7.4) containing  $10 \text{ U mL}^{-1}$  Tyr.

#### 5. Anti-fouling property

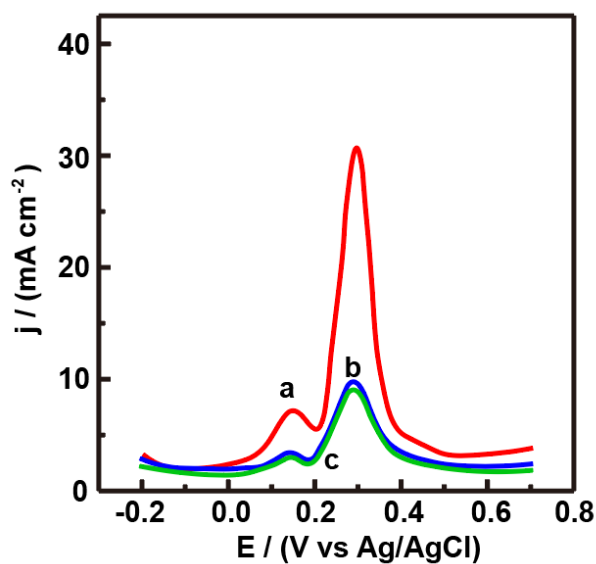

**Figure S12.** DPVs obtained at one GCE/Au/Pyyp electrode in (a) 0.1 M PBS solution (pH 7.4) containing  $10 \text{ U mL}^{-1}$  Tyr; (b) 0.1 M PBS solution (pH 7.4) containing  $10 \text{ U mL}^{-1}$  Tyr and 5 mM BSA; (c) a new 0.1 M PBS solution (pH 7.4) containing  $10 \text{ U mL}^{-1}$  Tyr and 5 mM BSA.

## 6. Selectivity tests

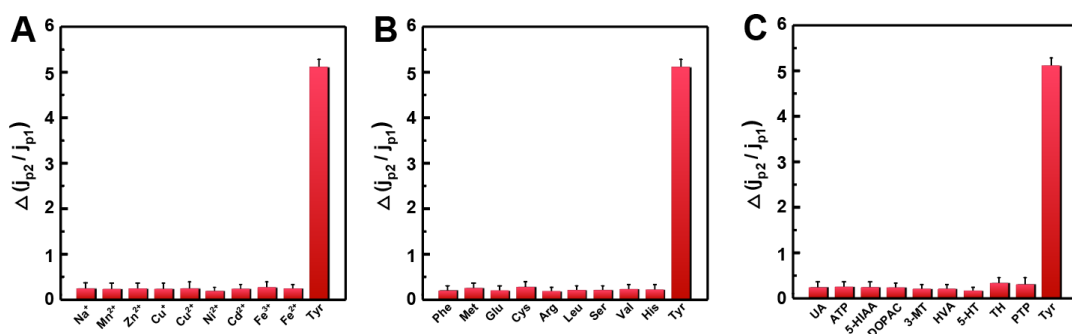

**Figure S13.** Selectivity tests for Tyr in the presence of (A) metal anions (Na<sup>+</sup>, Mn<sup>2+</sup>, Zn<sup>2+</sup>, Cu<sup>+</sup>, Cu<sup>2+</sup>, Ni<sup>2+</sup>, Cd<sup>2+</sup>, Fe<sup>3+</sup> and Fe<sup>2+</sup> respectively from left to right. Concentration: 100 mM for Na<sup>+</sup>, 10 μM for other ions. Control: 10 U mL<sup>-1</sup> Tyr), (B) amino acids (Phe, Met, Glu, Cys, Arg, Leu, Val and His respectively from left to right. Concentrations: 10 mM. Control: 10 U mL<sup>-1</sup> Tyr), (C) neurotransmitters and enzymes (UA, ATP, 5-HIAA, DOPAC, 3-MT, HVA, 5-HT, TH and PTP respectively from left to right. Concentrations: 10 μM. Control: 10 U mL<sup>-1</sup> Tyr).

## 7. Post calibration

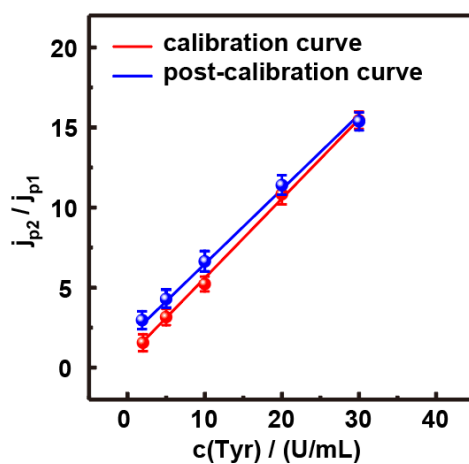

**Figure S14.** The post calibration of  $j_{p2}/j_{p1}$  value (blue) and the linear relationship of  $j_{p2}/j_{p1}$  value (red) in 0.1 M PBS with different Tyr activity.
